# Supplementary material for: The circadian rest-activity pattern predicts cognitive decline among mild-moderate Alzheimer’s disease patients
Source: PubMed Central journal article supplement (PMC8466995; doi:10.1186/s13195-021-00903-7), 2021-09-25

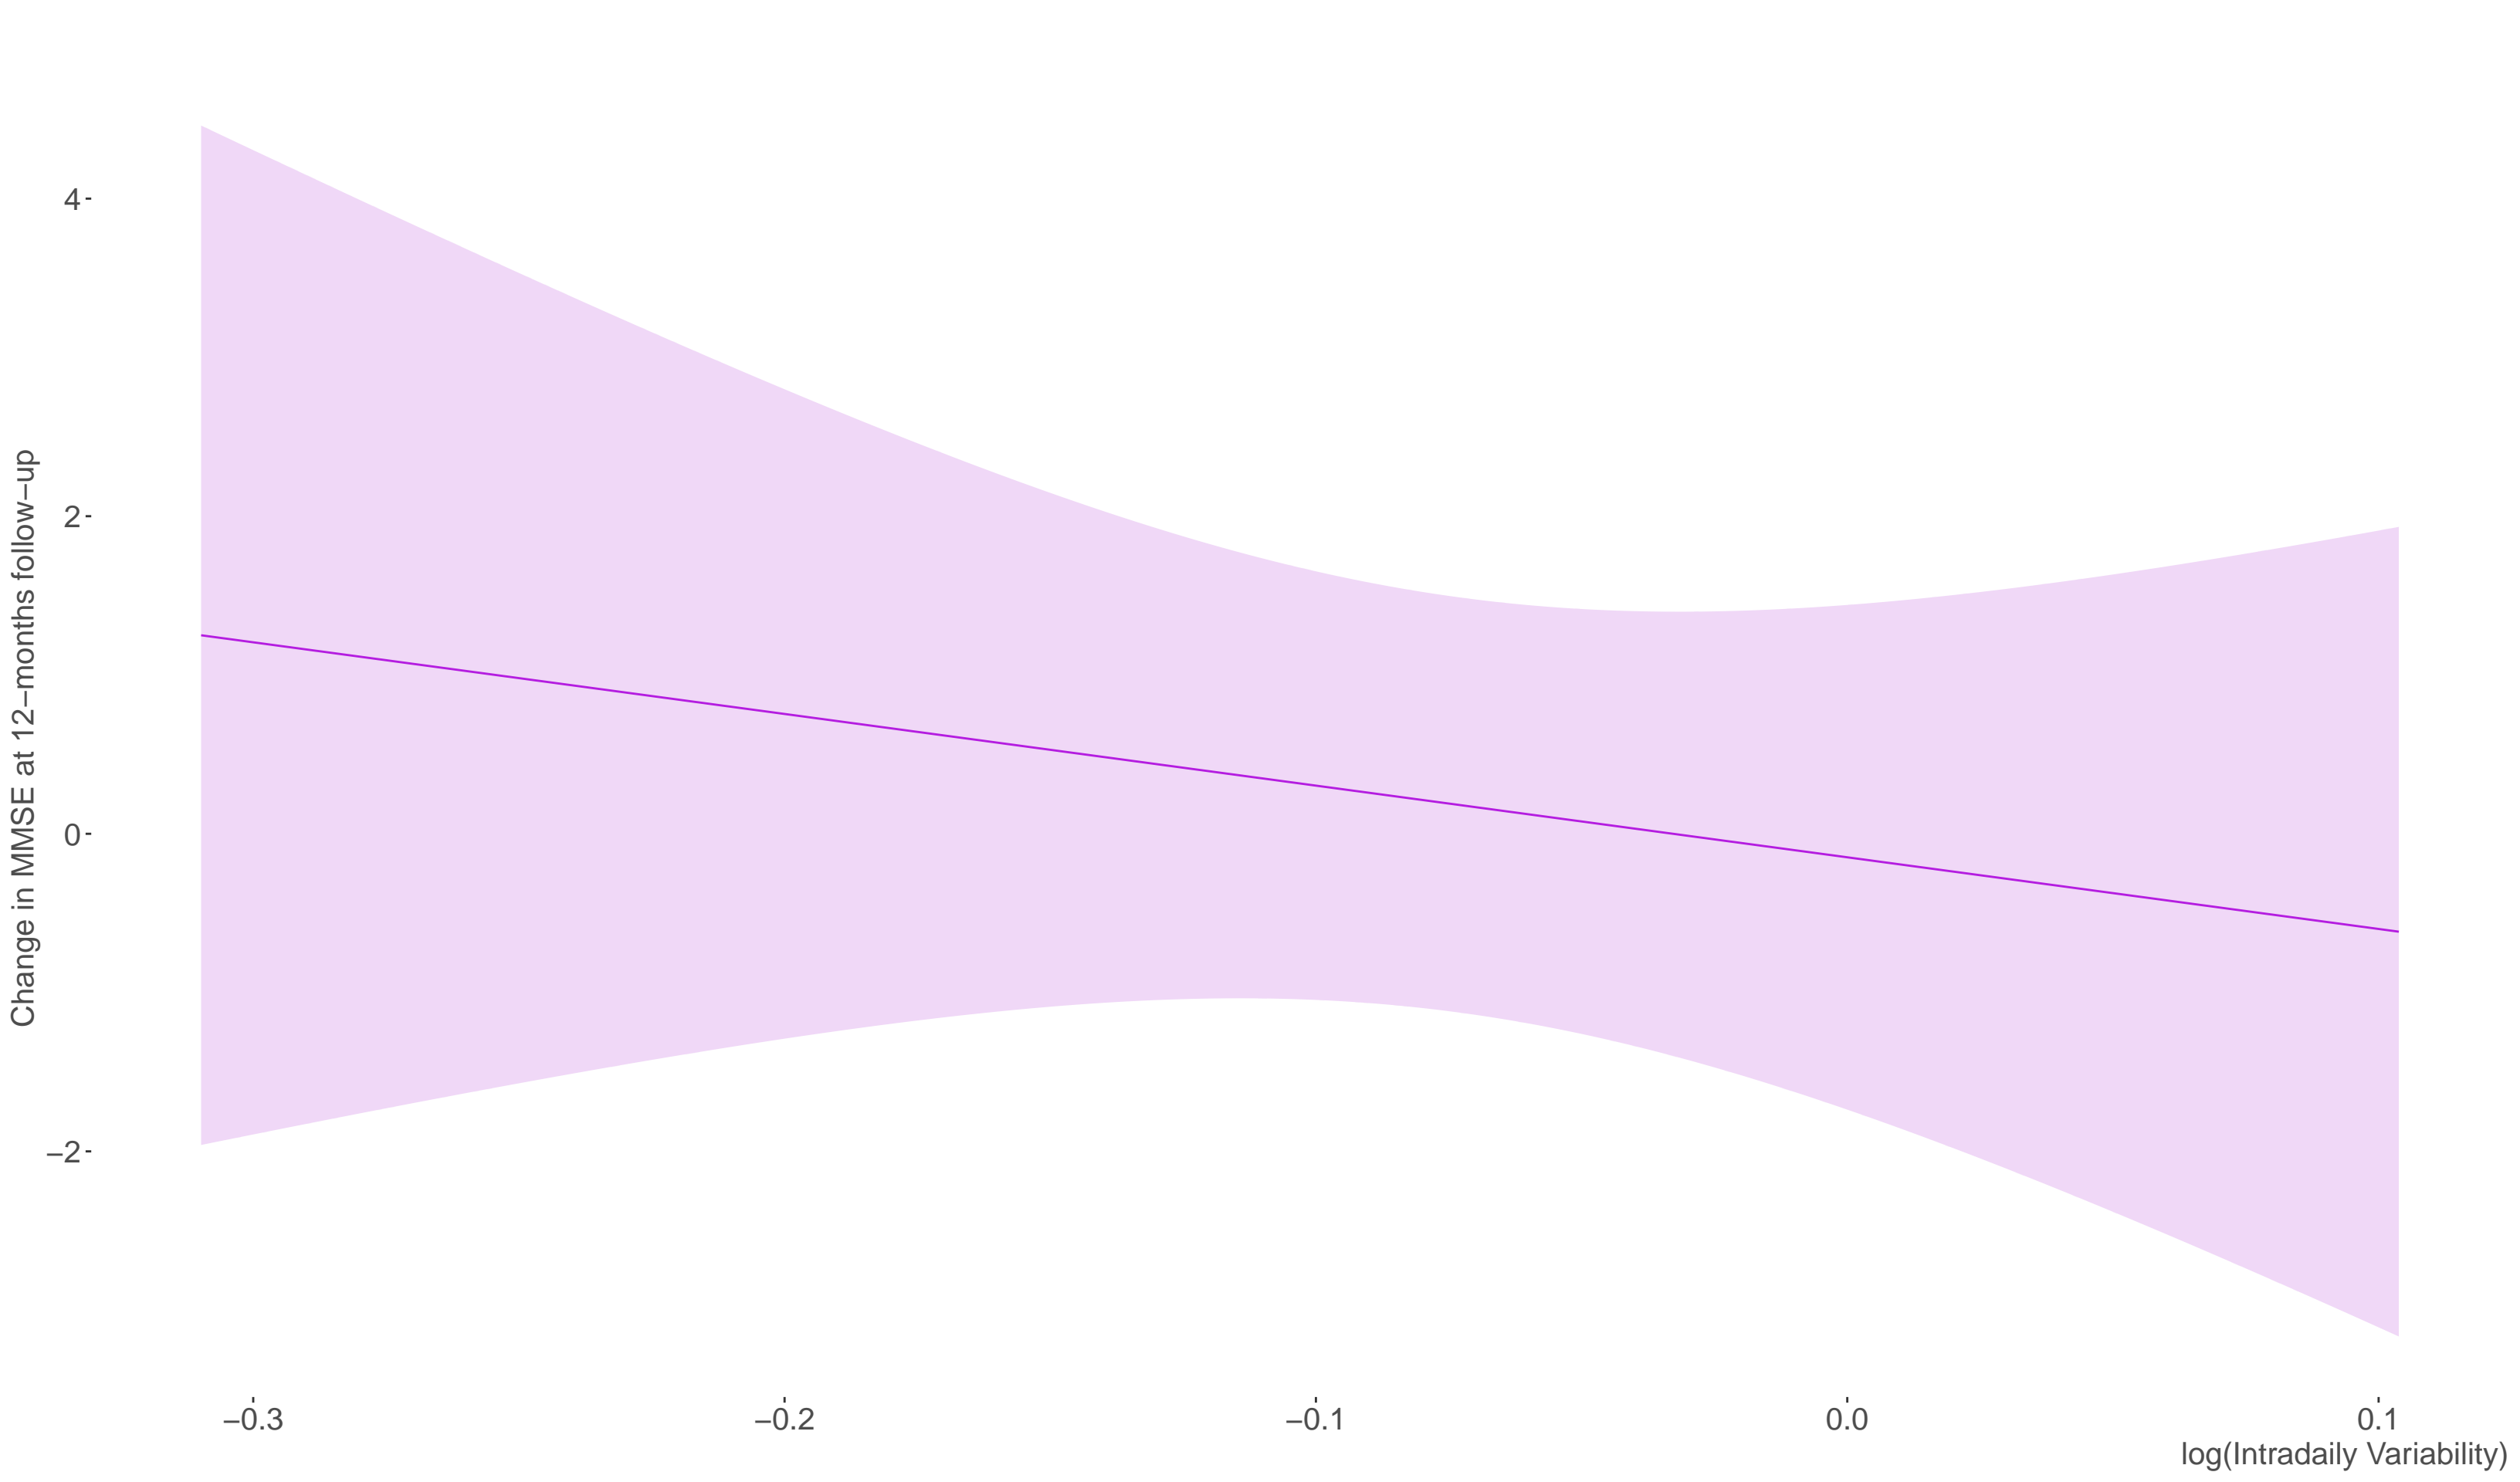

Supplement: 13195_2021_903_MOESM6_ESM.pdf [file 13195_2021_903_MOESM6_ESM.pdf]
